# Supplementary material for: Realizing outstanding electrochemical performance with Na3V2(PO4)2F3 modified with an ionic liquid for sodium-ion batteries
Source: Royal Society of Chemistry journal article supplement (doi:10.1039/d2ra01292h), 2022-01-01
Supplement: d2ra01292h1.pdf [file d2ra01292h1.pdf]

## Supporting Information for

# Realizing outstanding electrochemical performance with $\text{Na}_3\text{V}_2(\text{PO}_4)_2\text{F}_3$ modified by ionic liquid for sodium-ion batteries

Xiaobo Yu<sup>a</sup>, Tianyi Lu<sup>b</sup>, Xiaokai Li<sup>b</sup>, Jiawei Qi<sup>b</sup>, Luchen Yuan<sup>b</sup>, Zu Man<sup>b</sup>, Haitao Zhuo<sup>a,\*</sup>

<sup>a</sup>College of Chemistry and Environmental Engineering, Shenzhen University,  
Shenzhen, 518060, P. R. China

\* Corresponding author: [haitaozhuo@163.com](mailto:haitaozhuo@163.com)

Number of pages: 6

Number of figures: 5

Number of tables: 1

## TABLE OF CONTENT

1. Supplementary Figures

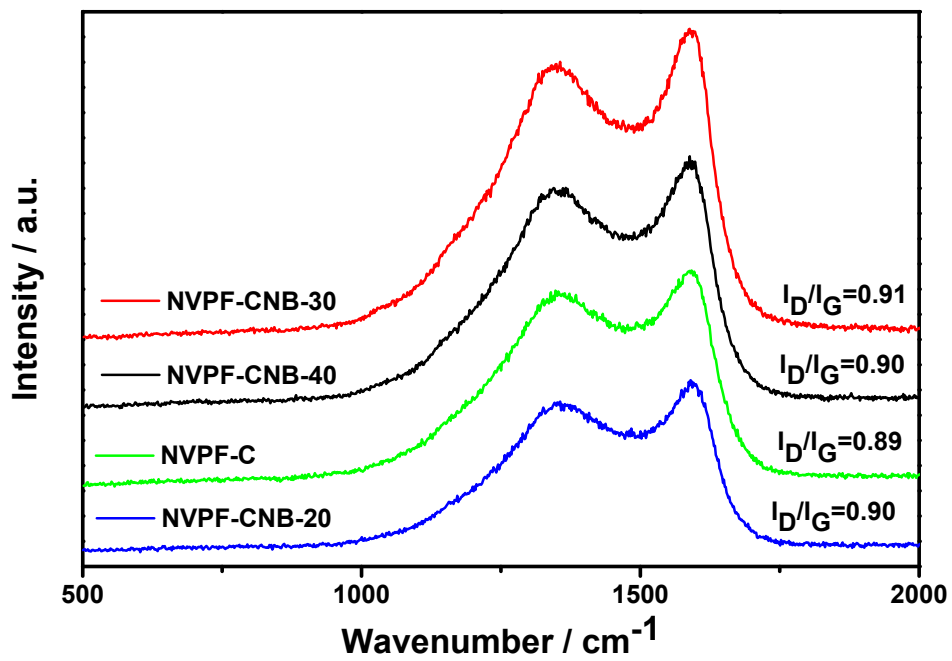

Fig. S1 Raman spectra of all samples.

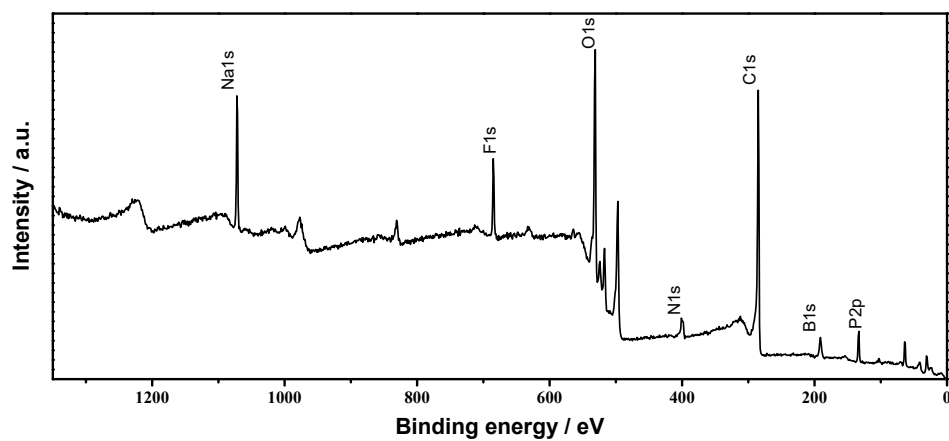

Fig. S2 Full XPS spectra of NVPF-CNB-30.

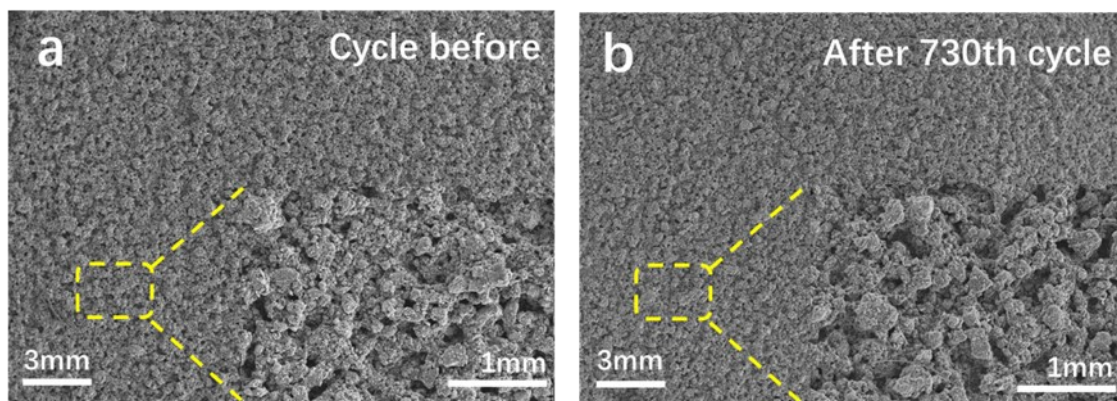

**Fig. S3** (a) SEM images of NVPF-CNB-30 anode before cycle, (b) SEM images of NVPF-CNB-30 anode after 730th cycle.

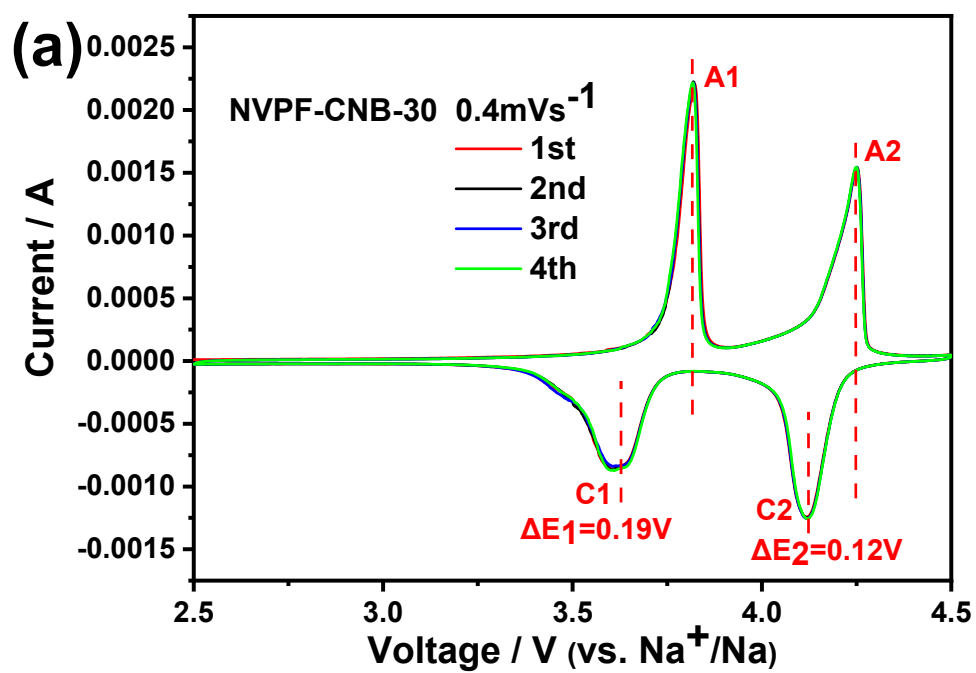

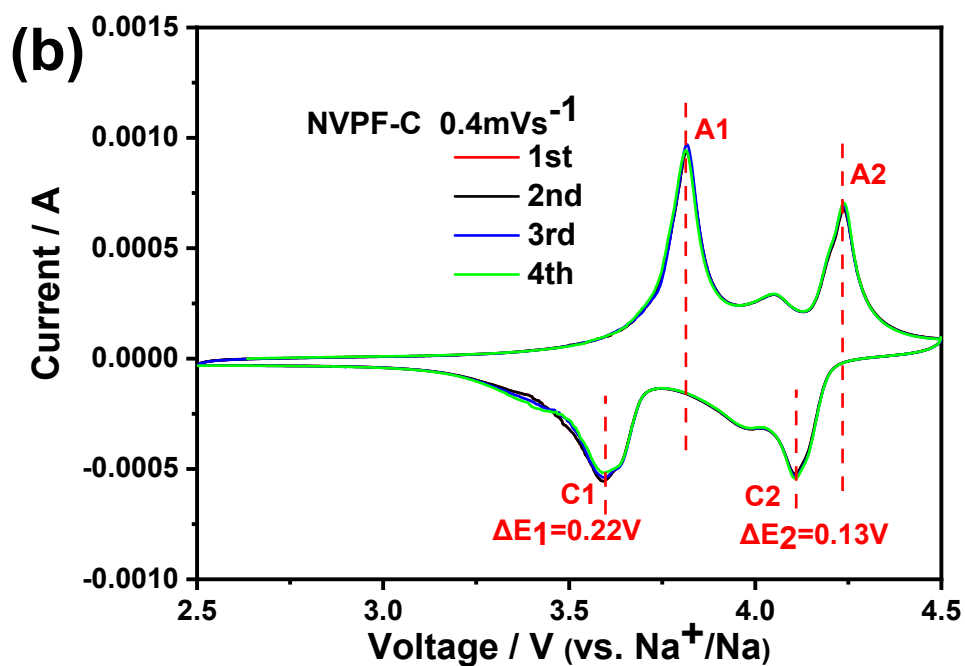

Fig. S4 CV curves of the four cycles of NVPF-CNB-30 and NVPF-C at a scanning rate of  $0.4 \text{ mV s}^{-1}$  between 2.5-4.5 V: (a) NVPF-CNB-30, (b) NVPF-C.

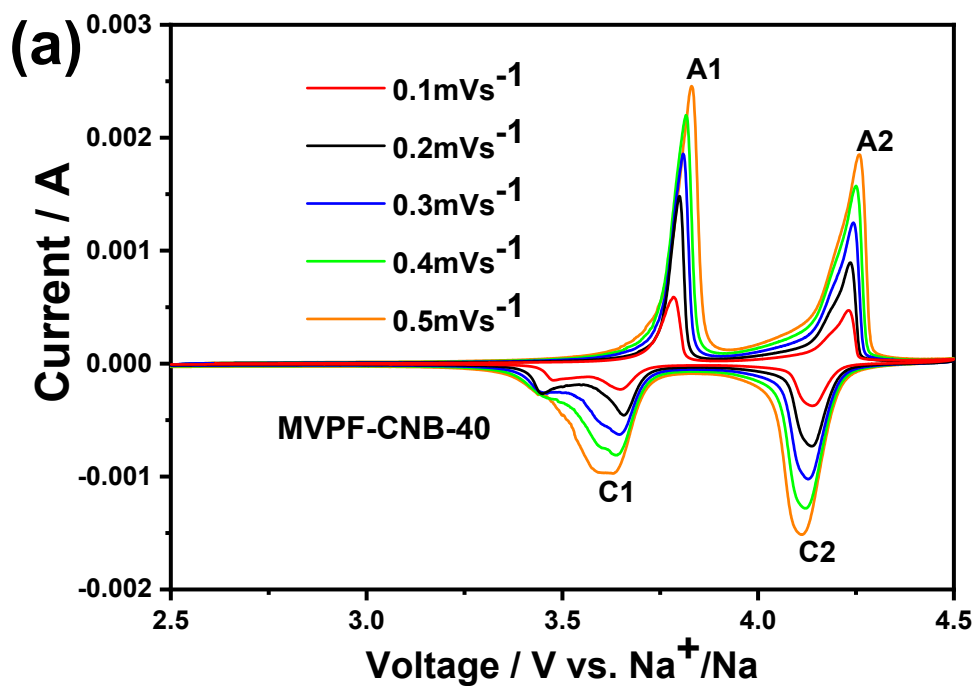

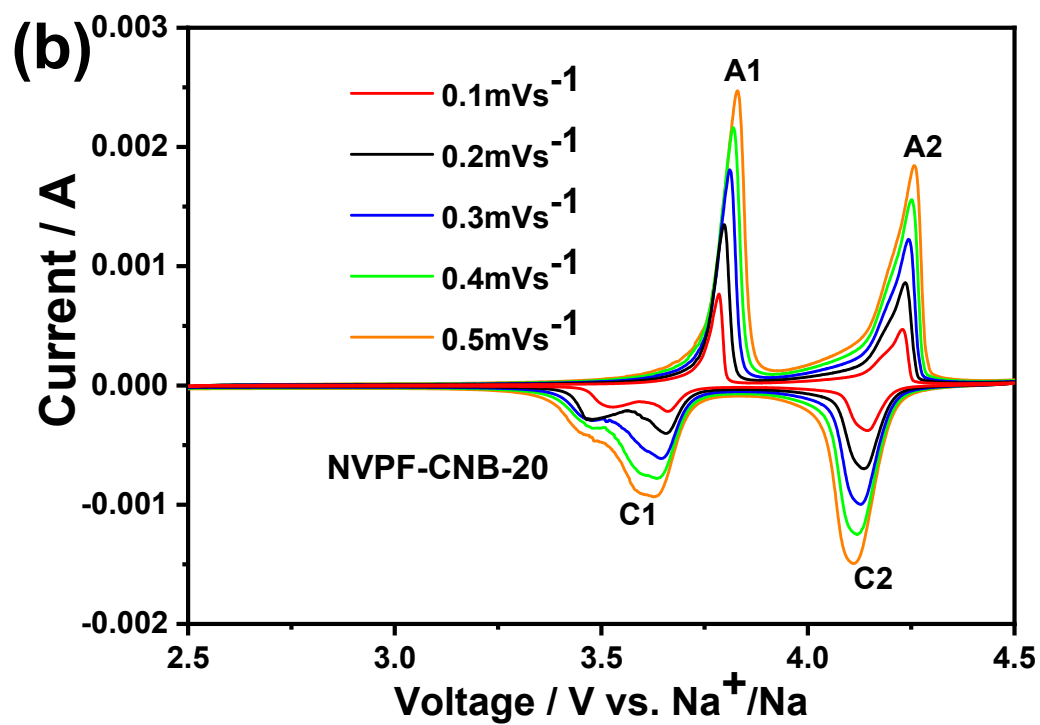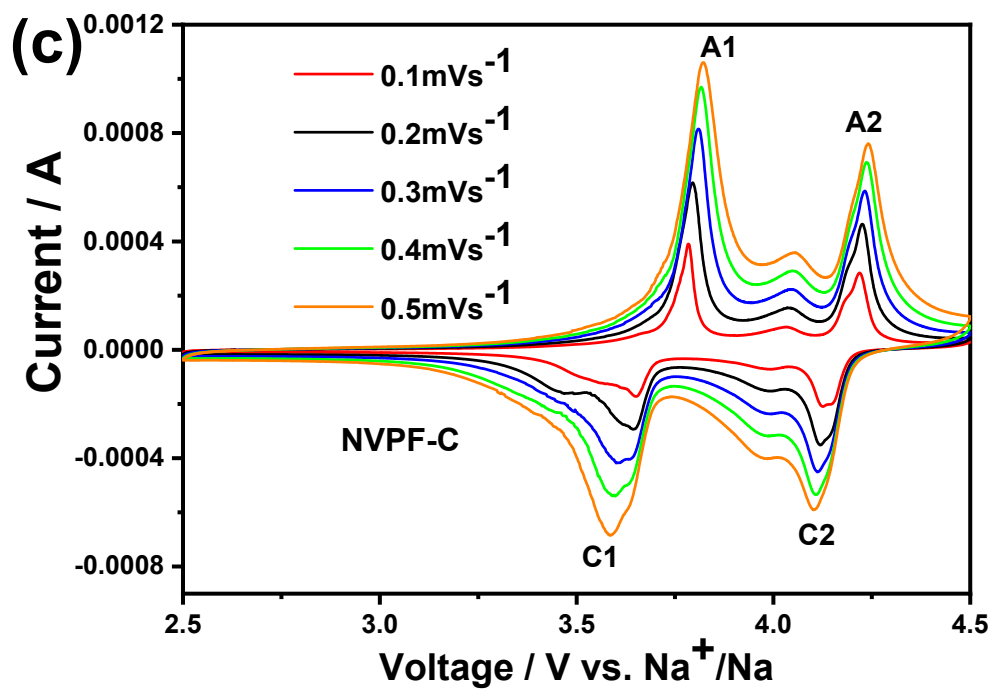

**Fig. S5** CV curves of NVPF-CNB-40, NVPF-CNB-20, NVPF-C at various scan rates,

respectively: (a) NVPF-CNB-40, (b) NVPF-CNB-20, (c) NVPF-C.

**Table S1** sodium ion diffusion coefficients at peak positions for all samples at a scan rate of  $0.5\text{mV}\cdot\text{s}^{-1}$ .

| Sample           | $D_{\text{Na}^+}$ ( $\text{cm}^2 \text{s}^{-1}$ ) |
|------------------|---------------------------------------------------|
| NVPF-CNB-30 (A1) | $4.9 \times 10^{-11}$                             |
| NVPF-CNB-30 (A2) | $3.5 \times 10^{-11}$                             |
| NVPF-CNB-30 (C1) | $1.94 \times 10^{-11}$                            |
| NVPF-CNB-30 (C2) | $2.7 \times 10^{-11}$                             |
| NVPF-CNB-20 (A1) | $4.2 \times 10^{-11}$                             |
| NVPF-CNB-20 (A2) | $3.15 \times 10^{-11}$                            |
| NVPF-CNB-20 (C1) | $1.62 \times 10^{-11}$                            |
| NVPF-CNB-20 (C2) | $2.6 \times 10^{-11}$                             |
| NVPF-CNB-40 (A1) | $4.28 \times 10^{-11}$                            |
| NVPF-CNB-40 (A2) | $3.2 \times 10^{-11}$                             |
| NVPF-CNB-40 (C1) | $1.71 \times 10^{-11}$                            |
| NVPF-CNB-40 (C2) | $2.62 \times 10^{-11}$                            |
| NVPF-C (A1)      | $1.85 \times 10^{-11}$                            |
| NVPF-C (A2)      | $1.32 \times 10^{-11}$                            |
| NVPF-C (C1)      | $1.2 \times 10^{-11}$                             |

---

NVPF-C (C2)

---

$1.03 \times 10^{-11}$
